# Supplementary material for: Determining optimal sampling conditions in the TSI Nanometer Aerosol Sampler 3089
Source: Copernicus journal article supplement (doi:10.5194/amt-18-1063-2025), 2025-02-28
Supplement: Supplementary file 1 [file amt-18-1063-2025-supplement.pdf]

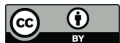

*Supplement of*

## **Determining optimal sampling conditions in the TSI Nanometer Aerosol Sampler 3089**

**Behnaz Alinaghypour et al.**

*Correspondence to:* Zoran Ristovski (z.ristovski@qut.edu.au)

The copyright of individual parts of the supplement might differ from the article licence.

## S1 Schematic diagram of the NAS, highlighting airflow patterns, aerosol deposition, and electrical field dynamics

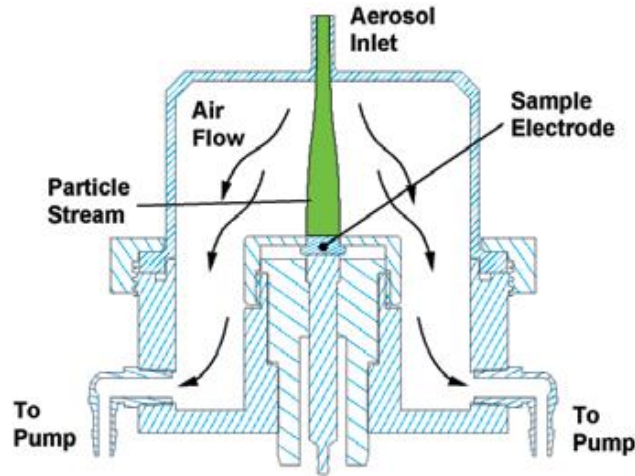

Fig. S1 Schematic diagram of the Nanometer Aerosol Sampler 3089, Copyright 2017 TSI Incorporated, Used with permission.

## S2 Comparison of SEM analysis with SMPS measurements

The particle size distributions were measured using a scanning mobility particle sizer (SMPS) and micrographs obtained by scanning electron microscopy (SEM) which are presented in Figure S2.

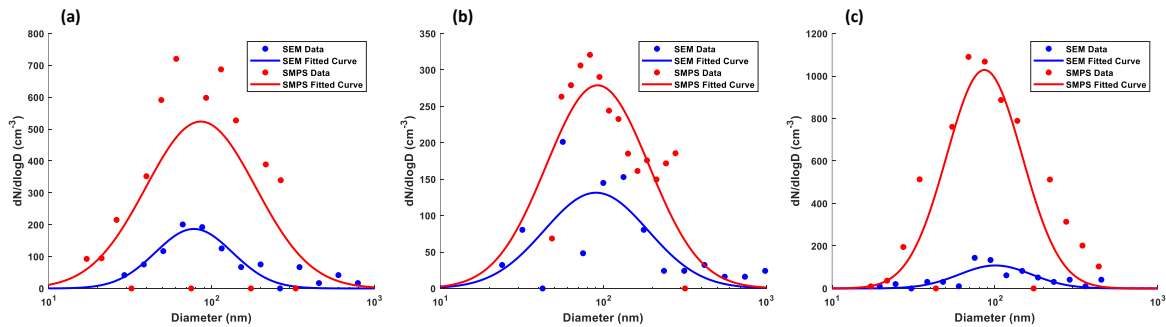

Fig. S2 Particle size distributions of (a) phosphate buffered saline (PBS) (b) Dulbecco's Modified Eagle Medium (DMEM), and (c) human saliva.
